# Supplementary material for: Changing clinical care cascade of patients with chronic hepatitis B in Beijing, China
Source: PubMed Central journal article supplement — Lancet Reg Health West Pac. 2021 Aug 25;16:100249. doi: 10.1016/j.lanwpc.2021.100249 (PMC8406027; doi:10.1016/j.lanwpc.2021.100249), 2021-08-25
Supplement: mmc1.pdf [file mmc1.pdf]

## Supplementary materials

**Table S1. Baseline characteristic of patients with chronic hepatitis B in care, 2010-2018**

| Variables                        | 2010          | 2011          | 2012          | 2013          | 2014          | 2015          | 2016          | 2017          | 2018          |
|----------------------------------|---------------|---------------|---------------|---------------|---------------|---------------|---------------|---------------|---------------|
| No. of CHB patients              | 15,810        | 33,926        | 47,570        | 58,122        | 65,947        | 74,352        | 80,565        | 87,833        | 94,495        |
| Age, mean±SD                     | 48·91±14·28   | 45·97±14·27   | 44·18±14·11   | 42·96±13·87   | 42·52±13·68   | 41·88±13·42   | 41·53±13·33   | 41·29±13·20   | 40·95±12·99   |
| Age, %                           |               |               |               |               |               |               |               |               |               |
| <30                              | 1272 (8·05)   | 3807 (11·22)  | 6620 (13·92)  | 9232 (15·89)  | 10788 (16·36) | 12818 (17·24) | 14362 (17·83) | 15693 (17·87) | 17033 (18·03) |
| 30-39                            | 2996 (18·95)  | 8326 (24·54)  | 12870 (27·05) | 16618 (28·59) | 19409 (29·43) | 22572 (30·36) | 25042 (31·08) | 27950 (31·82) | 30791 (32·58) |
| 40-49                            | 3314 (20·96)  | 7314 (21·56)  | 10190 (21·42) | 12353 (21·25) | 14177 (21·50) | 16189 (21·77) | 17355 (21·54) | 19183 (21·84) | 20802 (22·01) |
| 50-59                            | 4455 (28·18)  | 8080 (23·82)  | 10300 (21·65) | 11730 (20·18) | 12748 (19·33) | 13680 (18·40) | 14303 (17·75) | 14935 (17·00) | 15718 (16·63) |
| ≥60                              | 3773 (23·86)  | 6399 (18·86)  | 7590 (15·95)  | 8189 (14·09)  | 8825 (13·38)  | 9093 (12·23)  | 9503 (11·79)  | 10072 (11·47) | 10151 (10·74) |
| Male, %                          | 10526 (66·58) | 21707 (63·98) | 30016 (63·10) | 36470 (62·75) | 41395 (62·77) | 46333 (62·32) | 49908 (61·95) | 54668 (62·24) | 58975 (62·41) |
| Disease stage, %                 |               |               |               |               |               |               |               |               |               |
| Non-cirrhosis                    | 9239 (58·44)  | 22674 (66·83) | 33003 (69·38) | 40896 (70·36) | 46445 (70·43) | 52787 (71·00) | 57360 (71·20) | 62754 (71·45) | 68130 (72·10) |
| Cirrhosis                        | 4395 (27·80)  | 8249 (24·31)  | 10912 (22·94) | 13040 (22·43) | 14912 (22·61) | 16719 (22·48) | 18071 (22·43) | 20280 (23·09) | 20578 (21·78) |
| Hepatocellular carcinoma         | 2176 (13·76)  | 3003 (8·85)   | 3655 (7·68)   | 4186 (7·20)   | 4590 (6·96)   | 4846 (6·52)   | 5134 (6·37)   | 4799 (5·46)   | 5787 (6·12)   |
| Dual infection,%                 |               |               |               |               |               |               |               |               |               |
| Hepatitis C virus                | 346 (2·19)    | 615 (1·81)    | 842 (1·77)    | 938 (1·61)    | 1006 (1·53)   | 1131 (1·52)   | 1068 (1·33)   | 984 (1·12)    | 1013 (1·07)   |
| Hepatitis D virus                | 87 (0·55)     | 226 (0·67)    | 341 (0·72)    | 399 (0·69)    | 469 (0·71)    | 500 (0·67)    | 483 (0·60)    | 503 (0·57)    | 492 (0·52)    |
| Human immunodeficiency virus     | 6 (0·04)      | 10 (0·03)     | 30 (0·06)     | 37 (0·06)     | 45 (0·07)     | 68 (0·09)     | 58 (0·07)     | 96 (0·11)     | 86 (0·09)     |
| Co-liver disease,%               |               |               |               |               |               |               |               |               |               |
| Alcoholic liver disease          | 1073 (6·79)   | 1661 (4·90)   | 2054 (4·32)   | 2348 (4·04)   | 2531 (3·84)   | 2683 (3·61)   | 2789 (3·46)   | 2946 (3·35)   | 2996 (3·17)   |
| Nonalcoholic fatty liver disease | 1810 (11·45)  | 4257 (12·55)  | 6071 (12·76)  | 7176 (12·35)  | 8066 (12·23)  | 8928 (12·01)  | 9463 (11·75)  | 10062 (11·46) | 10326 (10·93) |
| Primary biliary cholangitis      | 1558 (9·85)   | 2885 (8·50)   | 3810 (8·01)   | 4656 (8·01)   | 5326 (8·08)   | 5860 (7·88)   | 6392 (7·93)   | 6913 (7·87)   | 7156 (7·57)   |

|                           |              |              |              |               |               |               |               |               |               |
|---------------------------|--------------|--------------|--------------|---------------|---------------|---------------|---------------|---------------|---------------|
| Drug-induced liver injury | 905 (5·72)   | 1906 (5·62)  | 2731 (5·74)  | 3355 (5·77)   | 3959 (6·00)   | 4469 (6·01)   | 4868(6·04)    | 5003 (5·70)   | 4976 (5·27)   |
| Co-morbidities, %         |              |              |              |               |               |               |               |               |               |
| Hypertension              | 3623 (22·91) | 7198 (21·22) | 9523 (20·02) | 10913 (18·78) | 11831 (17·94) | 12406 (16·69) | 12972 (16·10) | 13480 (15·35) | 13304 (14·08) |
| Diabetes                  | 2452 (15·51) | 4677 (13·79) | 6169 (12·97) | 7025 (12·09)  | 7631 (11·57)  | 8154 (10·97)  | 8451 (10·49)  | 8846 (10·07)  | 8667 (9·17)   |
| Hyperlipidemia            | 1578 (9·98)  | 3605 (10·63) | 5128 (10·78) | 6042 (10·40)  | 6785 (10·29)  | 7409 (9·96)   | 7852 (9·75)   | 8399 (9·56)   | 8452 (8·94)   |
| Cardiovascular disease    | 1419 (8·97)  | 2762 (8·14)  | 3833 (8·06)  | 4343 (7·47)   | 4580 (6·94)   | 4869 (6·55)   | 4995 (6·20)   | 5053 (5·75)   | 4749 (5·03)   |
| Chronic kidney disease    | 1332 (8·42)  | 2442 (7·20)  | 3147 (6·62)  | 3510 (6·04)   | 3686 (5·59)   | 3796 (5·11)   | 3826 (4·75)   | 3929 (4·47)   | 3601 (3·81)   |
| Cerebral stroke           | 665 (4·21)   | 1335 (3·94)  | 1816 (3·82)  | 2063 (3·55)   | 2062 (3·13)   | 2138 (2·88)   | 2173 (2·70)   | 2272 (2·59)   | 2177 (2·30)   |

CHB: chronic hepatitis B;

**Table S2. Baseline characteristic of patients with chronic hepatitis B on antiviral therapy, 2010-2018**

| Variables                        | 2010         | 2011          | 2012          | 2013          | 2014          | 2015          | 2016          | 2017          | 2018          |
|----------------------------------|--------------|---------------|---------------|---------------|---------------|---------------|---------------|---------------|---------------|
| No. of CHB patients              | 4,886        | 17,556        | 26,798        | 33,584        | 39,737        | 45,086        | 49,798        | 54,487        | 58,908        |
| Age, mean±SD                     | 47·12±12·83  | 45·14±13·16   | 43·76±13·22   | 42·69±13·05   | 42·18±12·95   | 41·75±12·76   | 41·41±12·67   | 41·11±12·55   | 40·86±12·38   |
| Age, %                           |              |               |               |               |               |               |               |               |               |
| >30                              | 353 (7·22)   | 1877 (10·69)  | 3545 (13·23)  | 5034 (14·99)  | 6337 (15·95)  | 7469 (16·57)  | 8532 (17·13)  | 9487 (17·41)  | 10331 (17·54) |
| 30-39                            | 1040 (21·29) | 4316 (24·58)  | 7134 (26·62)  | 9466 (28·19)  | 11442 (28·79) | 13244 (29·37) | 14969 (30·06) | 16772 (30·78) | 18533 (31·46) |
| 40-49                            | 1179 (24·13) | 4291 (24·44)  | 6432 (24·00)  | 7935 (23·63)  | 9448 (23·78)  | 10797 (23·95) | 11828 (23·75) | 13044 (23·94) | 14139 (24·00) |
| 50-59                            | 1456 (29·80) | 4381 (24·95)  | 6039 (22·53)  | 7099 (21·14)  | 7961 (20·03)  | 8785 (19·48)  | 9410 (18·90)  | 9831 (18·04)  | 10415 (17·68) |
| ≥60                              | 858 (17·56)  | 2691 (15·33)  | 3648 (13·61)  | 4050 (12·06)  | 4549 (11·45)  | 4791 (10·63)  | 5059 (10·16)  | 5353 (9·82)   | 5490 (9·32)   |
| Male, %                          | 3508 (71·80) | 12063 (68·71) | 18173 (67·81) | 22778 (67·82) | 26806 (67·46) | 30338 (67·29) | 33484 (67·24) | 36699 (67·35) | 39783 (67·53) |
| Disease stage, %                 |              |               |               |               |               |               |               |               |               |
| Non-cirrhosis                    | 2817 (57·65) | 11395 (64·91) | 17682 (65·98) | 22218 (66·16) | 26225 (66·00) | 29792 (66·08) | 32948 (66·16) | 36177 (66·40) | 39349 (66·80) |
| Cirrhosis                        | 1431 (29·29) | 4757 (27·10)  | 7012 (26·17)  | 8773 (26·12)  | 10429 (26·24) | 11923 (26·44) | 13152 (26·41) | 14821 (27·20) | 15237 (25·86) |
| Hepatocellular carcinoma         | 638 (13·06)  | 1404 (8·00)   | 2104 (7·85)   | 2593 (7·72)   | 3083 (7·76)   | 3371 (7·48)   | 3698 (7·43)   | 3489 (6·40)   | 4322 (7·34)   |
| Dual infection, %                |              |               |               |               |               |               |               |               |               |
| Hepatitis C virus                | 116 (2·37)   | 286 (1·63)    | 447 (1·67)    | 468 (1·39)    | 494 (1·24)    | 503 (1·12)    | 446 (0·90)    | 409 (0·75)    | 396 (0·67)    |
| Hepatitis D virus                | 29 (0·59)    | 160 (0·91)    | 248 (0·93)    | 285 (0·85)    | 317 (0·80)    | 340 (0·75)    | 365 (0·73)    | 410 (0·75)    | 413 (0·70)    |
| Human immunodeficiency virus     | 4 (0·08)     | 8 (0·05)      | 15 (0·06)     | 17 (0·05)     | 16 (0·04)     | 12 (0·03)     | 14 (0·03)     | 29 (0·05)     | 23 (0·04)     |
| Co-liver disease, %              |              |               |               |               |               |               |               |               |               |
| Alcoholic liver disease          | 153 (3·13)   | 437 (2·49)    | 692 (2·58)    | 832 (2·48)    | 958 (2·41)    | 1035 (2·30)   | 1109 (2·23)   | 1169 (2·15)   | 1181 (2·00)   |
| Nonalcoholic fatty liver disease | 639 (13·08)  | 2414 (13·75)  | 3608 (13·46)  | 4420 (13·16)  | 5162 (12·99)  | 5820 (12·91)  | 6232 (12·51)  | 6663 (12·23)  | 6978 (11·85)  |
| Primary biliary cholangitis      | 515 (10·54)  | 1532 (8·73)   | 2171 (8·10)   | 2711 (8·07)   | 3203 (8·06)   | 3554 (7·88)   | 3960 (7·95)   | 4336 (7·96)   | 4515 (7·66)   |
| Drug-induced liver injury        | 468 (9·58)   | 1465 (8·34)   | 2192 (8·18)   | 2743 (8·17)   | 3316 (8·34)   | 3799 (8·43)   | 4175 (8·38)   | 4339 (7·96)   | 4341 (7·37)   |
| Co-morbidities, %                |              |               |               |               |               |               |               |               |               |
| Hypertension                     | 1347 (27·57) | 4314 (24·57)  | 6101 (22·77)  | 7093 (21·12)  | 8054 (20·27)  | 8654 (19·19)  | 9187 (18·45)  | 9494 (17·42)  | 9524 (16·17)  |

|                        |             |              |              |              |              |              |              |              |              |
|------------------------|-------------|--------------|--------------|--------------|--------------|--------------|--------------|--------------|--------------|
| Diabetes               | 858 (17·56) | 2757 (15·70) | 3841 (14·33) | 4500 (13·40) | 5139 (12·93) | 5484 (12·16) | 5780 (11·61) | 6003 (11·02) | 6011 (10·20) |
| Hyperlipidemia         | 585 (11·97) | 2157 (12·29) | 3147 (11·74) | 3827 (11·39) | 4414 (11·11) | 4843 (10·74) | 5223 (10·49) | 5547 (10·18) | 5714 (9·70)  |
| Cardiovascular disease | 458 (9·37)  | 1496 (8·52)  | 2177 (8·12)  | 2568 (7·64)  | 2860 (7·19)  | 2977 (6·60)  | 3103 (6·23)  | 3133 (5·75)  | 3035 (5·15)  |
| Chronic kidney disease | 472 (9·66)  | 1423 (8·11)  | 1890 (7·05)  | 2151 (6·40)  | 2359 (5·94)  | 2439 (5·41)  | 2462 (4·94)  | 2480 (4·55)  | 2447 (4·15)  |
| Cerebral stroke        | 172 (3·52)  | 628 (3·58)   | 929 (3·47)   | 1070 (3·19)  | 1162 (2·92)  | 1220 (2·71)  | 1255 (2·52)  | 1305 (2·40)  | 1299 (2·21)  |

CHB: chronic hepatitis B;

a. Annual rate of CHB patients in care

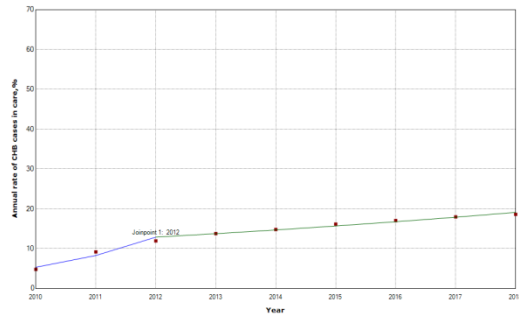

Observed 2010-2012 APC = 95.8% 2012-2018 APC = 6.8%  
\*Indicates that the Annual Percent Change (APC) is significantly different from zero at the alpha = 0.05 level.  
 Final Selected Model: 1, Joinpoint.

b. Annual rate of HBV tests

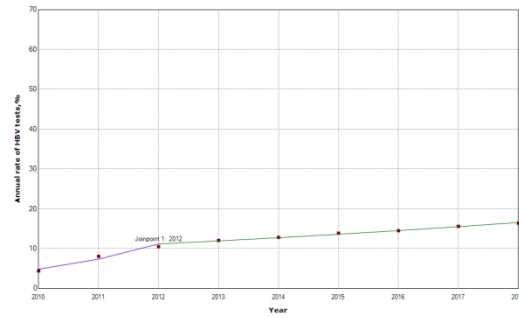

Observed 2010-2012 APC = 52.0% 2012-2018 APC = 6.8%  
\*Indicates that the Annual Percent Change (APC) is significantly different from zero at the alpha = 0.05 level.  
 Final Selected Model: 1, Joinpoint.

c. Annual rate of antiviral therapy among estimated CHB patients eligible for treatment

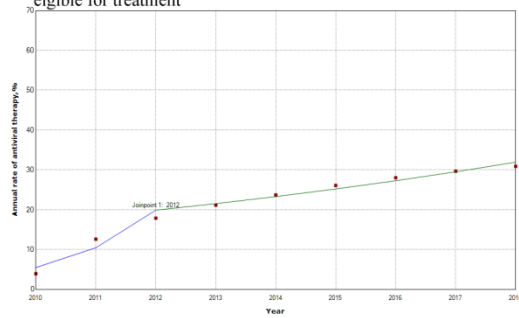

Observed 2010-2012 APC = 90.3% 2012-2018 APC = 8.2%  
\*Indicates that the Annual Percent Change (APC) is significantly different from zero at the alpha = 0.05 level.  
 Final Selected Model: 1, Joinpoint.

d. Annual rate of antiviral therapy among CHB patients in care

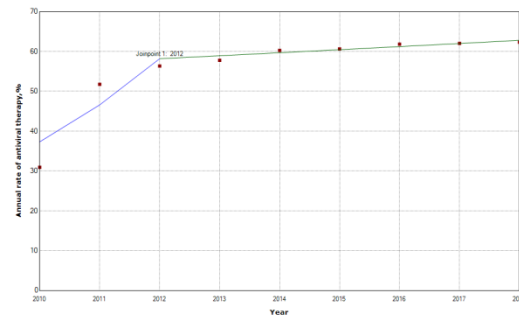

Observed 2010-2012 APC = 24.9% 2012-2018 APC = 1.3%  
\*Indicates that the Annual Percent Change (APC) is significantly different from zero at the alpha = 0.05 level.  
 Final Selected Model: 1, Joinpoint.

**Figure S1. Annual percentage change in rates of CHB patients in care, receiving HBV tests, and on antiviral therapy. CHB, chronic hepatitis B.**

a. CHB patients ever in care, stratified by gender

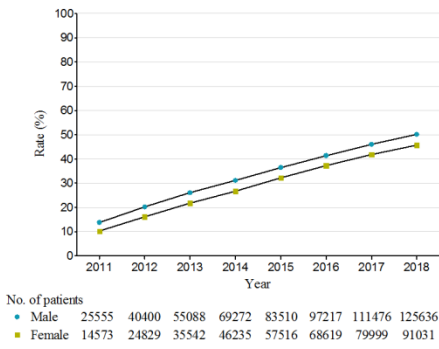

b. CHB patients ever in care, stratified by age

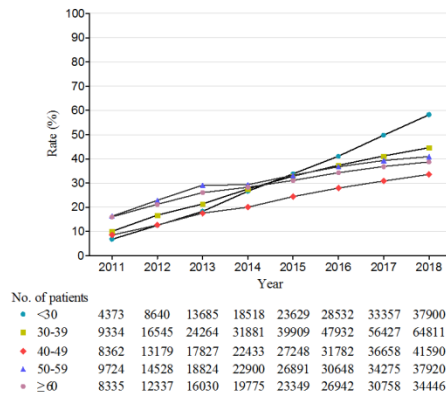

c. CHB patients ever received HBV tests, stratified by gender

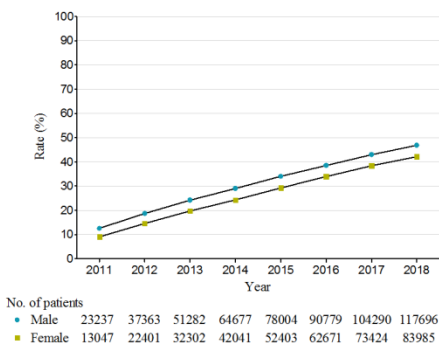

d. CHB patients ever received HBV tests, stratified by age

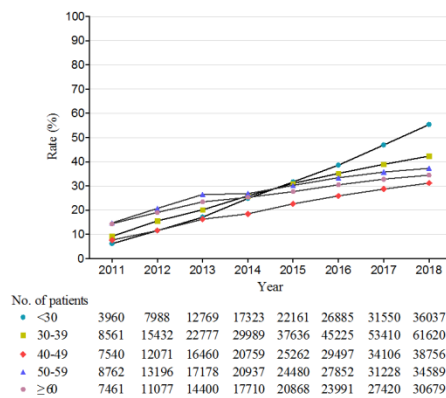

e. CHB patients ever received antiviral therapy, stratified by gender

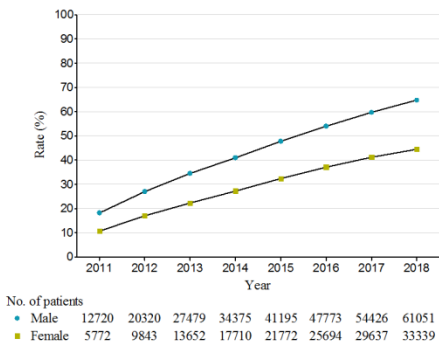

f. CHB patients ever received antiviral therapy, stratified by age

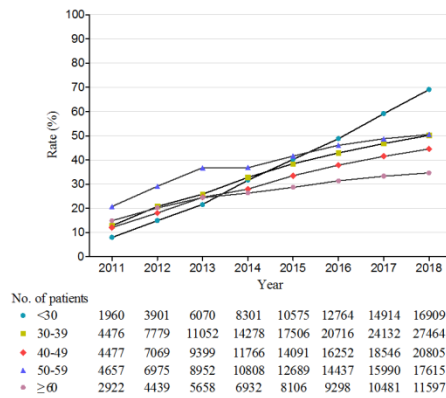

**Figure S2. Cumulative rates of patients with chronic hepatitis B in care, receiving HBV tests, and on antiviral therapy stratified by gender and age.** a and b is the rates of CHB patients in care among estimated HBsAg(+) population; c and d is the rates of HBV tests among estimated HBsAg(+) population; e and f is the rates of antiviral therapy among estimated eligible CHB patients for treatment. CHB, chronic hepatitis B.

a. CHB patients received antiviral therapy, stratified by gender

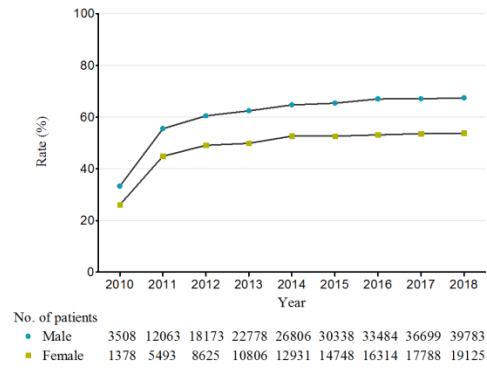

b. CHB patients received antiviral therapy, stratified by age

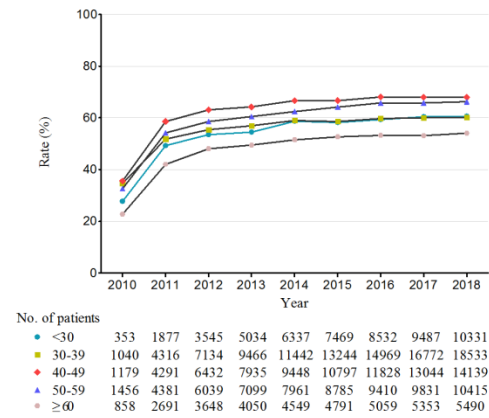

**Figure S3. Annual rates of antiviral therapy among patients with chronic hepatitis B in care, stratified by gender (a) and age (b). CHB, chronic hepatitis B.**

a. CHB patients ever received antiviral therapy, stratified by gender

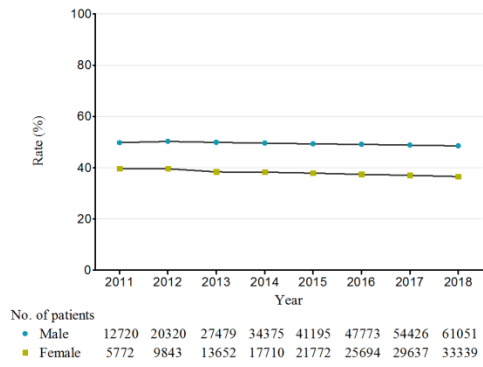

b. CHB patients ever received antiviral therapy, stratified by age

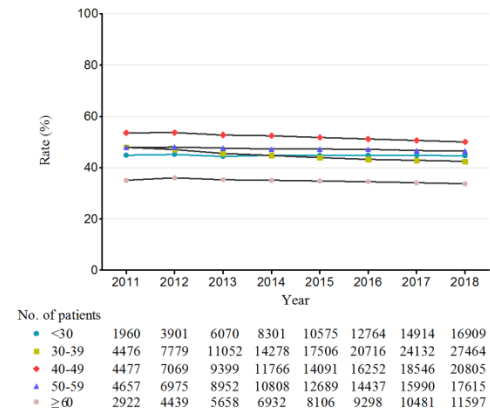

**Figure S4. Cumulative rates of antiviral therapy among patients with chronic hepatitis B ever in care, stratified by gender (a) and age (b). CHB, chronic hepatitis B.**



**Table S3. Times of hospital visits per year for patients with chronic hepatitis B**

|                             | <b>2010</b> | <b>2011</b> | <b>2012</b> | <b>2013</b> | <b>2014</b> | <b>2015</b> | <b>2016</b> | <b>2017</b> | <b>2018</b> |
|-----------------------------|-------------|-------------|-------------|-------------|-------------|-------------|-------------|-------------|-------------|
| No. of CHB patients in care | 15,810      | 33,926      | 47,570      | 58,122      | 65,947      | 74,352      | 80,565      | 87,833      | 94,495      |
| No. of hospital visits      |             |             |             |             |             |             |             |             |             |
| Median (IQR)                | 3 (1-7)     | 5 (2-11)    | 7 (2-13)    | 7 (2-13)    | 8 (2-13)    | 7 (2-13)    | 7 (2-13)    | 7 (2-13)    | 8 (2-13)    |
| <4 times                    | 8,369       | 13,691      | 17,722      | 20,972      | 23,150      | 26,225      | 28,118      | 30,515      | 32,780      |
| 4-7 times                   | 3,682       | 7,223       | 7,038       | 8,384       | 9,573       | 11,016      | 12,734      | 14,257      | 14,269      |
| 8-11 times                  | 1,883       | 5,538       | 7,416       | 9,147       | 10,826      | 12,275      | 13,517      | 14,561      | 15,374      |
| ≥12 times                   | 1,876       | 7,474       | 15,394      | 19,619      | 22,398      | 24,836      | 26,196      | 28,500      | 32,072      |

CHB, chronic hepatitis B. IQR, interquartile range.

**Table S4. Causes of patients hospitalized for CHB and its complications**

|                                      | Year   |        |        |        |        |        |        |        |        |
|--------------------------------------|--------|--------|--------|--------|--------|--------|--------|--------|--------|
|                                      | 2010   | 2011   | 2012   | 2013   | 2014   | 2015   | 2016   | 2017   | 2018   |
| No. of CHB patients in care          | 15,810 | 33,926 | 47,570 | 58,122 | 65,947 | 74,352 | 80,565 | 87,833 | 94,495 |
| No. of patients hospitalized for CHB | 7,995  | 9,410  | 11,264 | 12,899 | 11,484 | 10,402 | 10,299 | 10,101 | 9,773  |
| % per 100 CHB patients in care       | 50.57% | 27.74% | 23.68% | 22.19% | 17.41% | 13.99% | 12.78% | 11.50% | 10.34% |
| Causes                               |        |        |        |        |        |        |        |        |        |
| Chronic hepatitis B                  | 1155   | 1616   | 2602   | 3128   | 2372   | 2433   | 2335   | 1955   | 1774   |
| Compensated cirrhosis                | 2600   | 3133   | 2895   | 3234   | 3328   | 2497   | 2210   | 2045   | 1760   |
| Decompensated cirrhosis              | 506    | 769    | 1092   | 1239   | 1453   | 2716   | 3112   | 3558   | 3863   |
| Hepatocellular carcinoma             | 3734   | 3892   | 4675   | 5298   | 4331   | 2756   | 2642   | 2543   | 2376   |

CHB, chronic hepatitis B.
